# Supplementary material for: Room temperature NH3 detection of Ti/graphene devices promoted by visible light illumination
Source: Royal Society of Chemistry journal article supplement (doi:10.1039/c6tc04416f), 2017-01-01
Supplement: c6tc04416f1.pdf [file c6tc04416f1.pdf]

Supplementary Information for

**Room Temperature NH<sub>3</sub> Detection of Ti / Graphene devices**

**Promoted by Visible Light Illumination**

Min Zhao<sup>a,c</sup>, Lanqin Yan<sup>a</sup>, Xianfeng Zhang<sup>a</sup>, Lihua Xu<sup>a</sup>, Zhiwei Song<sup>a</sup>, Peipei Chen<sup>a,\*</sup>, Fengliang Dong<sup>a,\*</sup>, and Weiguo Chu<sup>a,b,\*</sup>

<sup>a</sup> CAS Center for Excellence in Nanoscience, National Center for Nanoscience and Technology, Beijing 100190, China.

<sup>b</sup> University of Chinese Academy of Sciences, Beijing 100039, China.

<sup>c</sup> Lingnan Normal University, Zhanjiang, Guangdong, 524048, China.

\*corresponding authors: [wgchu@nanoctr.cn](mailto:wgchu@nanoctr.cn), [chenpp@nanoctr.cn](mailto:chenpp@nanoctr.cn), [dongfl@nanoctr.cn](mailto:dongfl@nanoctr.cn)

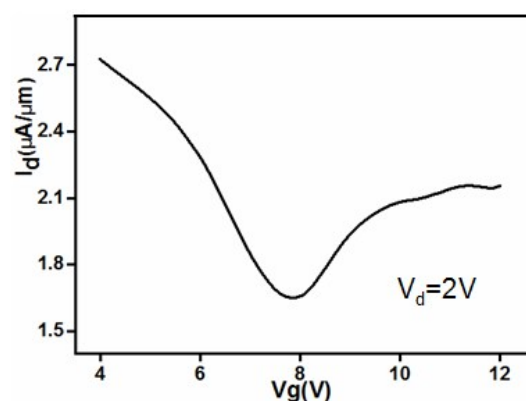

Figure S1. Transfer characteristic curve of a top gate field effect transistor of pristine graphene.

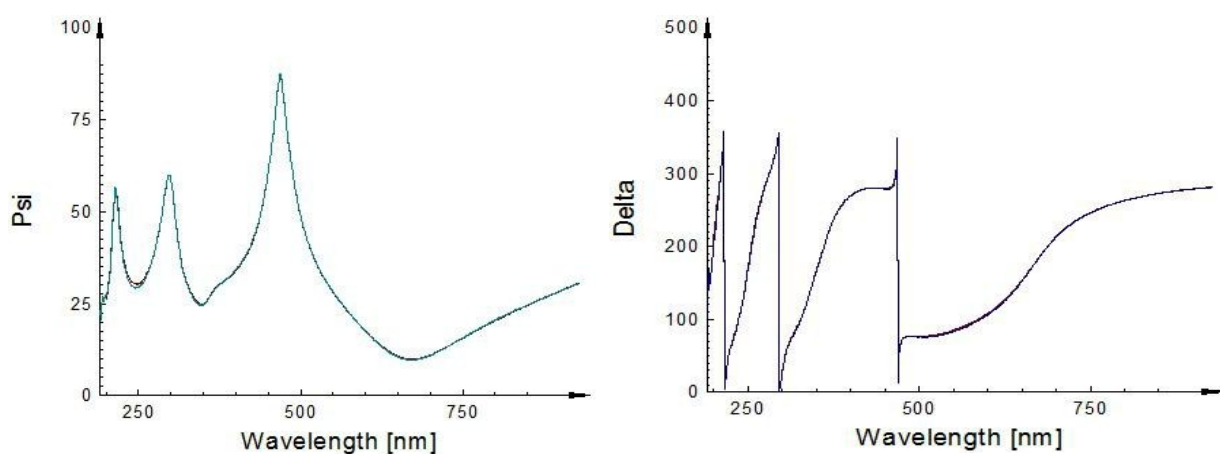

Figure S2. Experimental and fitted ellipsometry curves of the 3 nm Ti/Gr device.

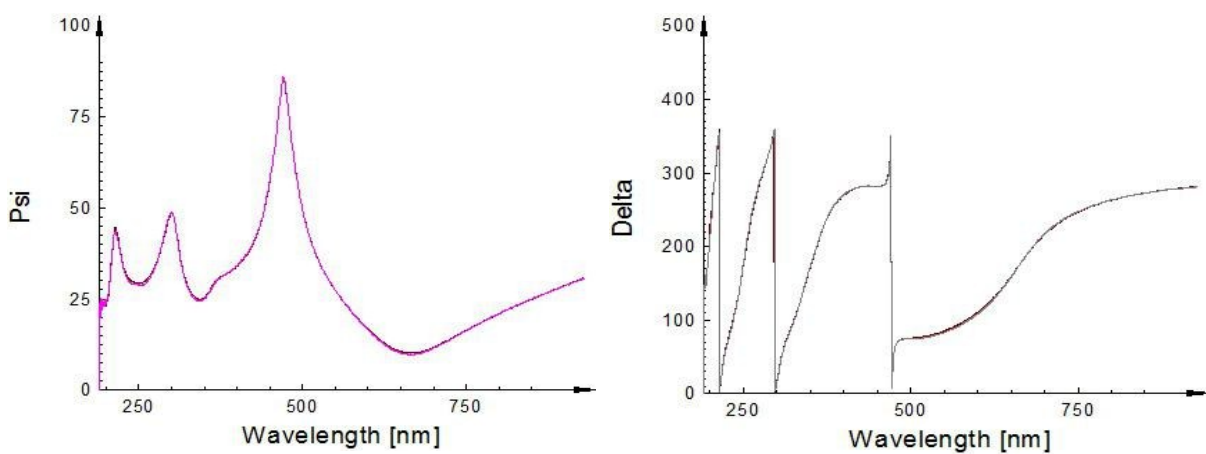

Figure S3. Experimental and fitted ellipsometry curves of the 5 nm Ti/Gr device.

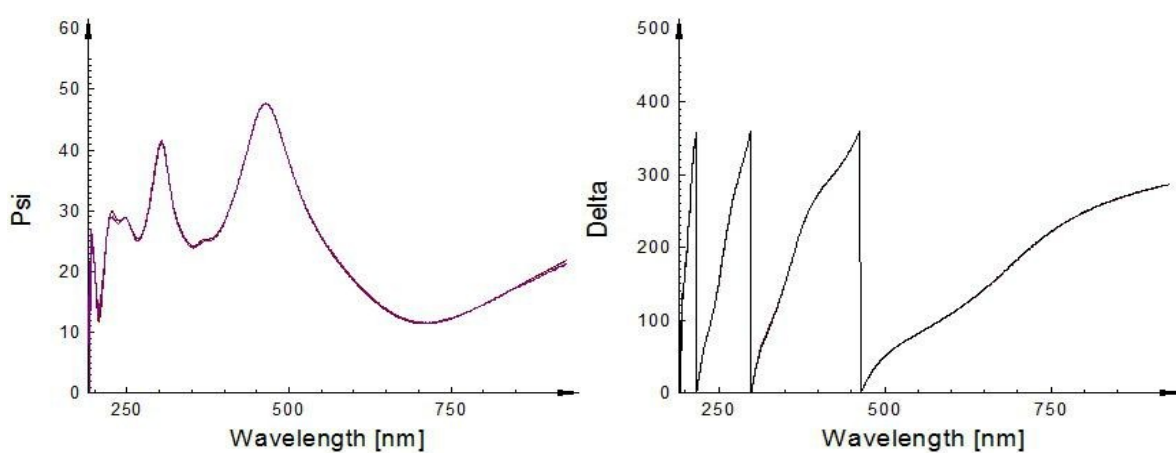

Figure S4. Experimental and fitted ellipsometry curves of the 10 nm Ti/Gr device.

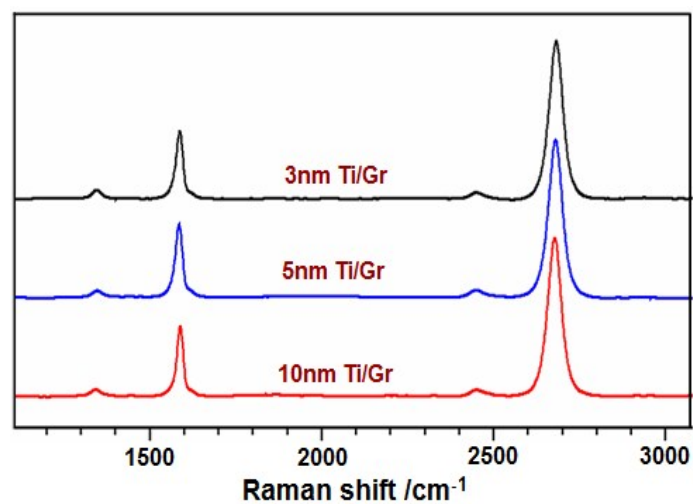

Figure S5. Micro-Raman spectra of the 3, 5, and 10nm Ti/Gr devices.

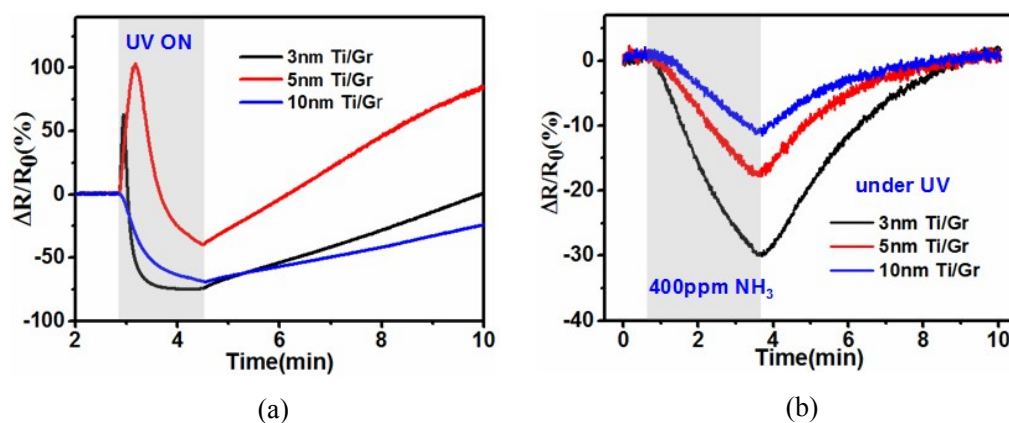

Figure S6. (a) The resistance change of the Ti/Gr devices when initially exposed to UV (254nm) light illumination, the gray area in the figure represents the time of UV light illumination, (b) The response of the Ti/Gr devices when exposed to 400ppm  $\text{NH}_3$  for 3 minutes under UV light illumination, the gray area in the figure represents the 3 min exposure to 400 ppm  $\text{NH}_3$  gas.

Table S1. Fitted parameters derived from ellipsometry data of the 3, 5 and 10 nm Ti/Gr devices.

| Devices                                              | 3nm Ti/Gr | 5nm Ti/Gr | 10nm Ti/Gr |
|------------------------------------------------------|-----------|-----------|------------|
| Thickness of Titanium oxides (nm)                    | 3.13      | 5.1       | 9.5        |
| Thickness of graphene (nm)                           | 0.34      | 0.34      | 0.36       |
| Thickness of SiO <sub>2</sub> insulating layers (nm) | 298.6     | 295.5     | 291.6      |
| Mean square error of fitting                         | 1.28      | 1.3       | 1.01       |

Table S2. The response/recovery times of the devices in the dark and under visible light illumination.

| Devices             |             | 3nm Ti/Gr | 5nm Ti /Gr | 10nm Ti /Gr |
|---------------------|-------------|-----------|------------|-------------|
| Response time (min) | in the dark | 2.6       | 2.7        | 2.7         |
|                     | under light | 2.9       | 2.5        | 2.5         |
| Recovery time (min) | in the dark | 7.2       | 5.2        | 4.7         |
|                     | under light | 4.9       | 2.7        | 3.4         |
